# Supplementary material
Source: publisher site journal article supplement (https://www.dovepress.com/article/457340)
Supplement: Supplementary file 1 [file get_supplementary_file.php]

Supplementary table 1. Primer sequence for PCR

| **Gene name** | **Forward primer (5' to 3')** | **Reverse primer (5' to 3')** |
| --- | --- | --- |
| IL1 | TGACACCTTACAAAACCCGGA | AGGTCTCTCCCATAAATGCACA |
| IL6 | ACTTCCAGCCAGTTGCCTTCTTG | TGGTCTGTTGTGGGTGGTATCCTC |
| TNFa | ATGGGCTCCCTCTCATCAGTTCC | CCTCCGCTTGGTGGTTTGCTAC |
| S100A9(413bp) | GGAAGAGTGACACTGAGAACCACTG | AAGCAAGACAGCCTACCTGCCAT |
| ANP | AAGAACCTGCTAGACCACCTGGAG | TGCTTCCTCAGTCTGCTCACTCAG |
| BNP | GGAAGTCCTAGCCAGTCTCCAGAG | GCCTTGGTCCTTCAAGAGCTGTC |
| MYHC | CAGAACACCAGCCTCATCAACCAG | TTCTCCTCTGCGTTCCTACACTCC |
| S100A9 | CTGAACAAGGCGGAATTCAAAG | AGGTCCTCCATGATGTCTCTTA |
| GAPDH | AGGTCGGTGTGAACGGATTTG | TGTAGACCATGTAGTTGAGGTCA |
| bACT | GGCTGTATTCCCCTCCATCG | CCAGTTGGTAACAATGCCATGT |
| mtND2 | ATAATCTCCCACCACCACCAAAACC | AGGAAAGCGGTAGGGTAAGGGTAC |
| COX1 | CACCCGAGCCTACTTTACATCTGC | TCCTCCATGTAGTGTAGCGAGTCAG |
| COX2 | ACAAGCACAATAGACGCCCAAGAAG | TCGTAGGGAGGGAAGGGCAATTAG |
| COX3 | CGGCTCAACATTCTTCATAGCAACG | TGTCAGTATCATGCTGCGGCTTC |
| TFAM | CTGAGTGGAAGGTGTACAAAGA | CTTCCTTCTCTAAGCCCATCAG |
| TFBM | CCACCATTCGGGAGATCATT | AGACTGCCAGCTTTCCTTAC |
| mtATP6 | GCCTAATCAGCAACCGACTACACTC | GGGCTCAGGTTCGTCCTTTTGG |
| mtATP8 | CTCCTCAATAGCCACACTATTTAT | TGATTCTCAAGGGTTATTCGTT |

Supplementary table 2. Specific antibodies for Western-blot, IHC and co-IP

| **Antibodies name** | **Product number** | **Manufacturer or Company** |
| --- | --- | --- |
| NLRP3 | ab263899 | Abcam |
| NF-κB P65 | #8242 | Cell Signaling Technology |
| p-P65 | #3033 | Cell Signaling Technology |
| Caspase-1 | sc-56036 | Santa Cruz Biotechnology |
| Drp1 | #8570 | Cell Signaling Technology |
| Pink1 | #6946 | Cell Signaling Technology |
| Parkin | #2132 | Cell Signaling Technology |
| Gaphd | #5174 | Cell Signaling Technology |
| bActin | 81115-1-RR | Proteintech Group |
| Acta2 | 14395-1-AP | Proteintech Group |
| ATP5 (IHC and co-IP) | 66600-1-Ig | Proteintech Group |
| ATP5 (Western-blot) | PAG387Ra01 | Cloud-Clone Corp |
| S100A9 | #73425 | Cell Signaling Technology |
| S100A8 | #47310 | Cell Signaling Technology |
| Goat Anti-Rabbit IgG Fluor 488 | ab150077 | Abcam |
| Goat Anti-Mouse IgG Fluor 647 | ab150115 | Abcam |
| HRP-labeled Goat Anti-Rabbit IgG(H+L) | A0208 | Beyotime |
| HRP-labeled Goat Anti-Mouse IgG(H+L) | A0216 | Beyotime |
| HRP-conjugated Mouse Anti-Rabbit IgG(L) | AS061 | Abclone |

Supplementary table 3. Detailed information on the SICM dataset included in the study

| **GO accession** | **Platform** | **Organism** | **Model** | **Age** | **Sex** | **Tissue** | **Group** |
| --- | --- | --- | --- | --- | --- | --- | --- |
| GSE44363 | Affymetrix GPL1262 | Mus musculus | LPS | 14 w | Male | Left ventricle | 4 vs 4 |
| GSE53007 | Illumina GPL6885 | Mus musculus | PCI | 20-30w | Male | heart muscle | 4 vs 4 |
| GSE40180 | Illumina GPL6887 | Mus musculus | CLP | 6-12w | Female | heart muscle | 5 vs 5 |
| GSE35934 | Phalanx GPL6845 | Mus musculus | LPS | NA | NA | heart muscle | 3 vs 3 |
| GSE9667 | Affymetrix GPL339 | Mus musculus | CLP | NA | NA | heart muscle | 6 vs 6 |
| GSE159309 | [Arraystar](https://www.arraystar.com/microarrays/) GPL25916 | Rattus norvegicus | LPS | 8w | Male | Left ventricle | 10 vs 10 |
| GSE125042 | Agilent GPL22145 | Rattus norvegicus | CLP | NA | Male | Left ventricle | 5 vs 5 |
| GSE79962 | Affymetrix GPL6244 | [Homo sapiens](https://www.ncbi.nlm.nih.gov/Taxonomy/Browser/wwwtax.cgi?mode=Info&id=9606) | Sepsis | NA | NA | Left ventricle | 11 vs 20 |
| GSE141864 | Affymetrix GPL17586 | [Homo sapiens](https://www.ncbi.nlm.nih.gov/Taxonomy/Browser/wwwtax.cgi?mode=Info&id=9606) | Sepsis | NA | NA | heart muscle | 2 vs 8 |

Abbreviations: LPS, lipopolysaccharides treatment; PCI, peritoneal contamination and infection; CLP, cecum ligation and puncture; NA, not available.

Supplementary table 4. 48 co-DEGs in 5 mice SICM datasets

| **SICM datasets** | **Total** | **Gene** |
| --- | --- | --- |
| GSE35934 GSE40180 GSE44363 GSE53007 GSE9667 | 12 | Serpina3n; Lcn2; Ms4a6d; Lrg1; Osmr; Socs3; S100a9; Fcgr2b; Fcgr2b; S100a8; Casp4; Abca8a; Nfkbiz |
| GSE35934 GSE40180 GSE44363 GSE9667 | 3 | Upp1; Plac8; Asns |
| GSE35934 GSE44363 GSE53007 GSE9667 | 4 | Samhd1; Dhx58; Rsad2; Lgals9 |
| GSE35934 GSE40180 GSE44363 GSE53007 | 21 | Arrdc4; Timp1; Map3k8; Myd88; Gadd45g; Clec4d; Irak3; Cyb561; Ccl2; Fen1; Gcnt2; Cdkn1a; Sdc4; Slc10a6; Slc15a3; Mmp3; Cd14; Icam1; Ch25h; Abca9; Cxcl1; |
| GSE40180 GSE44363 GSE53007 GSE9667 | 8 | Hamp; Cfb; Pdk4; Angptl4; 2210407C18Rik; Fpr2; Saa3; Ucp3; |

Supplementary table 5. The basic characteristics and laboratory test of sepsis patients

| **Parameters** | **Mean(N=44)** | **SD** |
| --- | --- | --- |
| Age | 65.66 | ±16.23 |
| APACHE II score  SOFA score | 15.75  6.30 | ±7.03  ±3.80 |
| PCT(ng/ml) | 27.84 | ±32.95 |
| CRP(mg/l) | 156.46 | ±106.05 |
| pro-BNP(ng/l) | 10222.10 | ±14427.80 |
| cTNI(ng/l) | 74.97 | ±82.98 |
| CK(U/L) | 279.16 | ±506.93 |
| CKMB(ng/ml) | 5.07 | ±6.18 |
| LVEF(%) | 59.15 | ±8.52 |
| LVEDD(mm) | 47.47 | ±5.09 |
| LVESD(mm) | 32.74 | ±5.52 |

Abbreviations: PCT, Procalcitonin; CRP, C-reactive protein; pro-BNP, pro-B-type natriuretic peptide; cTNI, Myocardial troponin I; CK, Creatine Kinase; CKMB, creatine kinase isoenzyme MB; LVEF, Left Ventricular Ejection Fractions; LVEDD, left ventricular end diastolic diameter; LVESD, Left Ventricular End Systolic Diameter. *, P<0.05; **, P<0.01; ***, P<0.001

Supplementary table 6. Protein–Protein interactions between S100A8/9 with Acta2

| Docking energy | -222.4kcal/mol | |  | |
| --- | --- | --- | --- | --- |
| S100A8/9  (PDB ID: 1XK4) | Acta2  (UniProt ID: P62736) | Bond type | | Bond distance(Å) |
| GLU-92 | TYR-145 | H-bonds | | 3.0Å |
| GLU-9 | GLN-362 | H-bonds | | 3.3Å |

Supplementary table 7. Protein–Protein interactions between S100A8/9 with Atp5f1a

| Docking energy | -235.74 kcal/mol | |  | |
| --- | --- | --- | --- | --- |
| S100A8/9  (PDB ID: 1XK4) | Atp5f1a  (UniProt ID: P25705) | Bond type | | Bond distance(Å) |
| ARG-416 | LYS-4 | H-bonds | | 2.7Å |
| ASP-390 | ARG-10 | H-bonds | | 3.4Å |
| LYS-354 | GLN-7 | H-bonds | | 3.4Å |
| SER-184 | SER-6 | H-bonds | | 2.2Å |
| ALA-176 | SER-90 | H-bonds | | 2.5Å |
| ILE-179 | THR-87 | H-bonds | | 3.1Å |

Supplementary table 8. Protein–Protein interactions between S100A8/9 with Atp5f1b

| Docking energy | -248.86kcal/mol | |  | |
| --- | --- | --- | --- | --- |
| S100A8/9  (PDB ID: 1XK4) | Atp5f1b  (UniProt ID: P06576) | Bond type | | Bond distance(Å) |
| ARG-387 | SER-75 | H-bonds | | 2.8Å |
| ARG-387 | THR-68 | H-bonds | | 3.3Å |
| ASP-365 | ARG-85 | H-bonds | | 2.3Å |
| GLN-313 | HIS-91 | H-bonds | | 3.0Å |
| GLU-317 | HIS-91 | H-bonds | | 3.3Å |


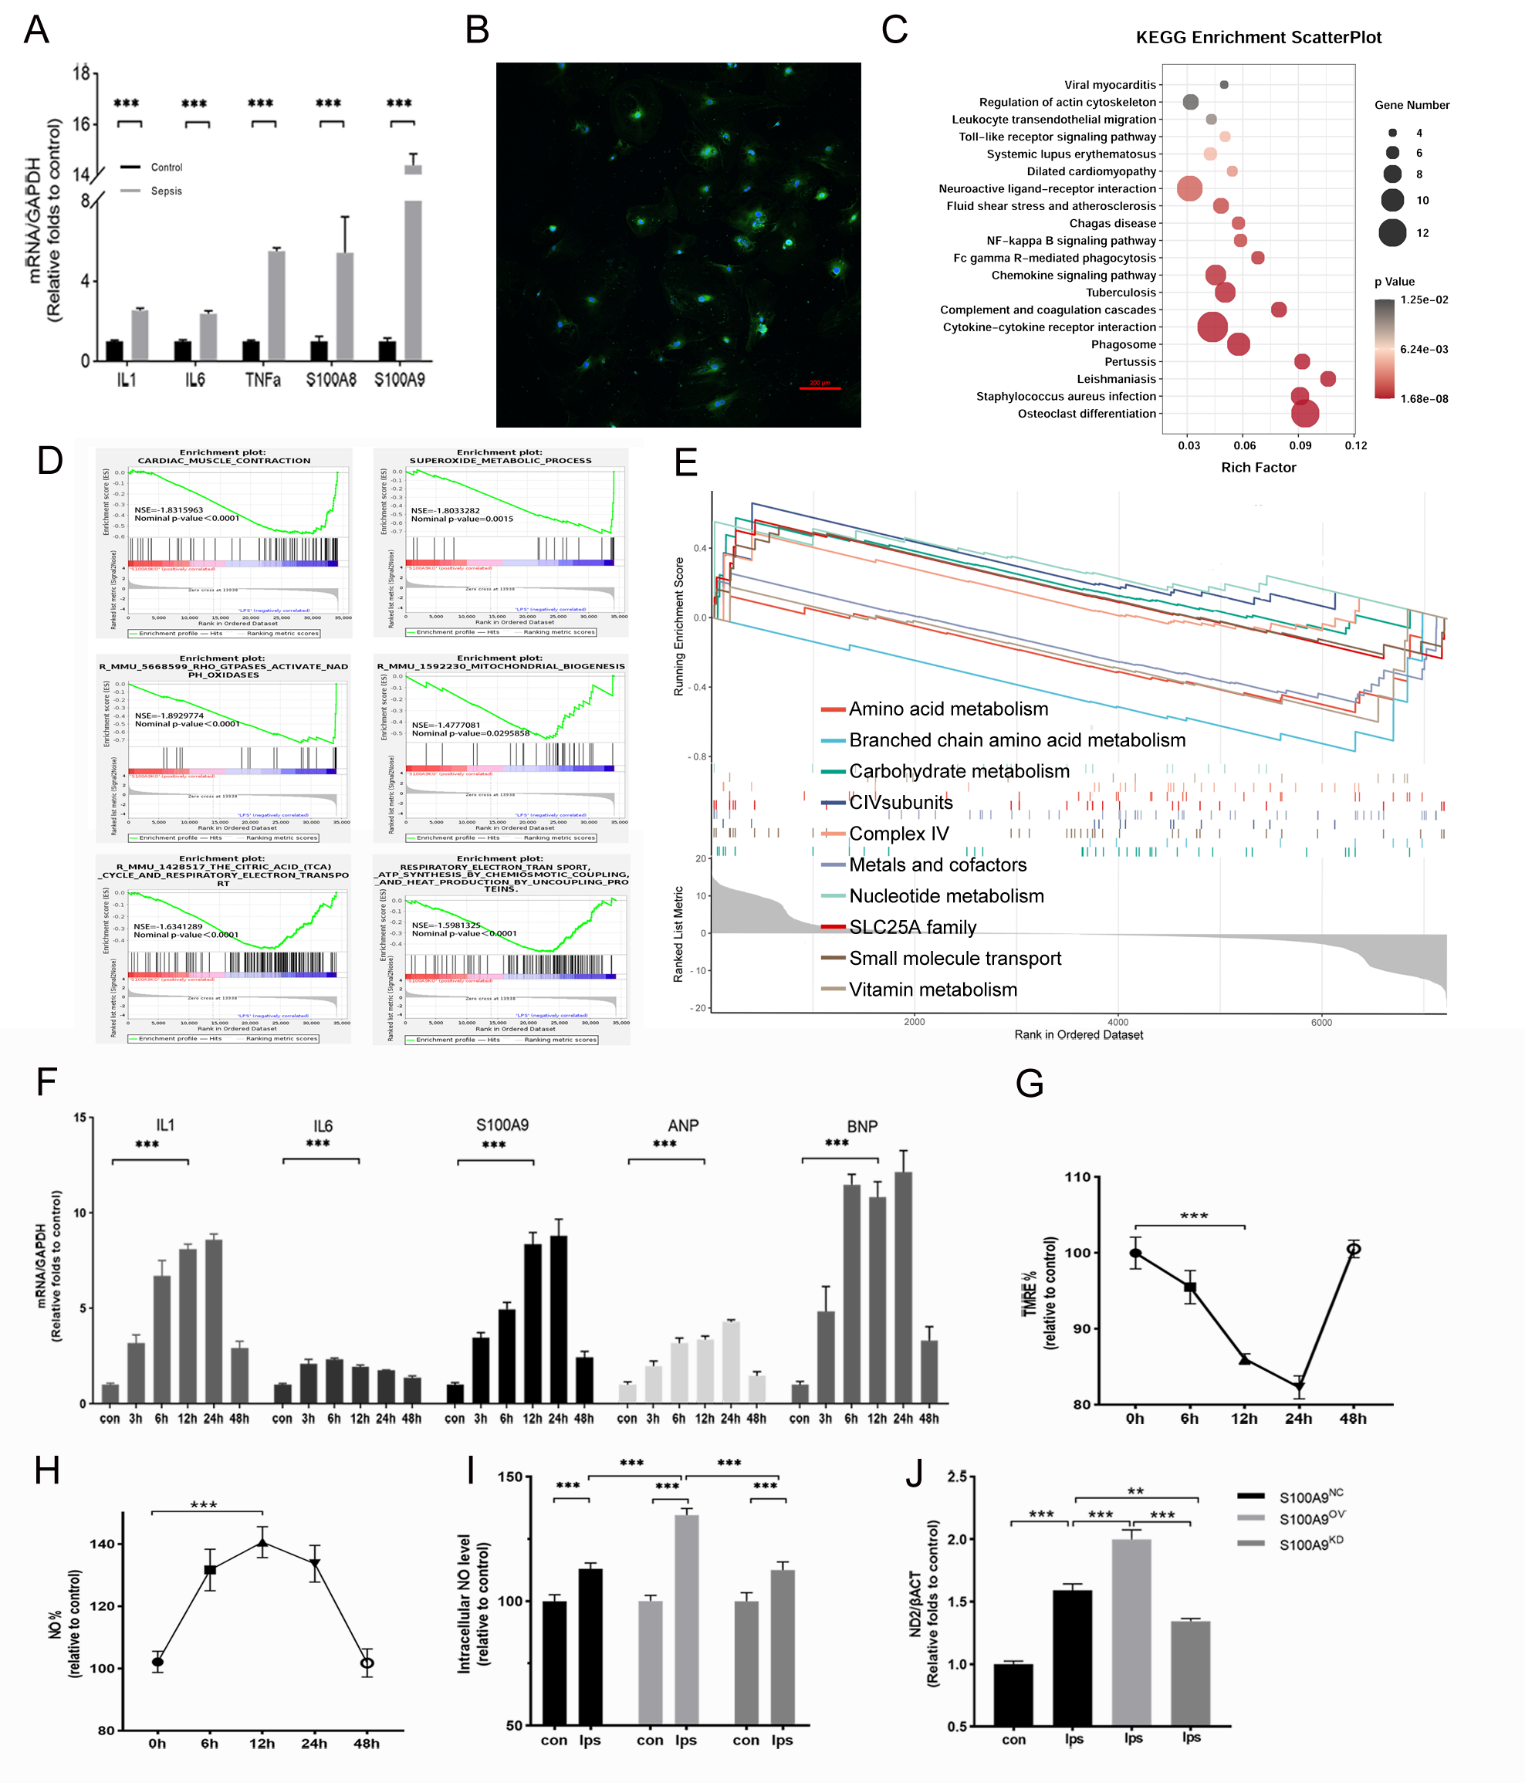


Supplementary Figure

A, The mRNA transcript levels of IL1, IL6, TNFα, S100A8 and S100A9 in the myocardium after LPS 12h. B, Immunofluorescence staining of alpha-actinin 2 (Actn2) (Green fluorescence) and DIPA (Blue fluorescence) in primary cardiomyocytes. C, The top 20 of signaling pathways by KEGG enrichment analysis. D, GSEA enrichment analysis of DEGs between WT-lps group and S100A9KO-lps group. Pathways associated with cardiac muscle contraction, superoxide metabolic process, activate NADPH oxidases, TCA cycle, respiratory electron transport, and mitochondrial biogenesis of primary myocardial cells were significantly enriched in WT-lps group. E, GSEA enrichment analysis of DEGs between WT-lps group and S100A9KO-lps group with MitoCarta3.0 datasets. F, The mRNA transcript levels of IL1, IL6, S100A9, ANP and BNP in H9C2 cells after LPS in a time-dependent manner. G/H, Detection of TMRE and DAA fluorescence intensity within LPS stimulation 0-48 hours by Microplate reader. I, Detection of DAA fluorescence intensity in H9C2 cells after LPS stimulation 12h by Flow cytometry. J, Analysis of mtDNA ND2 copy number normalized to βACT in H9C2 cardiomyocytes, and nuclear βACT gene as endogenous control. The data were shown as the mean ± SEM, from n=3 per group. ns, no significance; *, P<0.05; **, P<0.01; ***, P<0.001. Abbreviations: IL1, interleukin 1; IL6, interleukin 6; TNFα，tumor necrosis factor alpha；GAPDH, glyceraldehyde-3-phosphate dehydrogenase; Con, Control; LPS, Lipopolysaccharides; NC, negative control; OV, Overexpression of S100A9 gene; KD, Knockdown of S100A9 gene; TMRE, tetramethylrhodamine, specifically recognize mitochondrial membrane potentials.
